# Supplementary material
Source: Copernicus journal article supplement (doi:10.5194/jm-45-275-2026)
Supplement: Supplementary file 1 [file jm-45-275-2026-supplement.pdf]

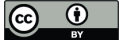

*Supplement of*

## **Dinoflagellate cysts as indicators of primary productivity along a Baltic Sea–North Sea–Atlantic transect**

**Cecile S. Hilgen et al.**

*Correspondence to:* Cecile S. Hilgen (c.s.hilgen@uu.nl)

The copyright of individual parts of the supplement might differ from the article licence.

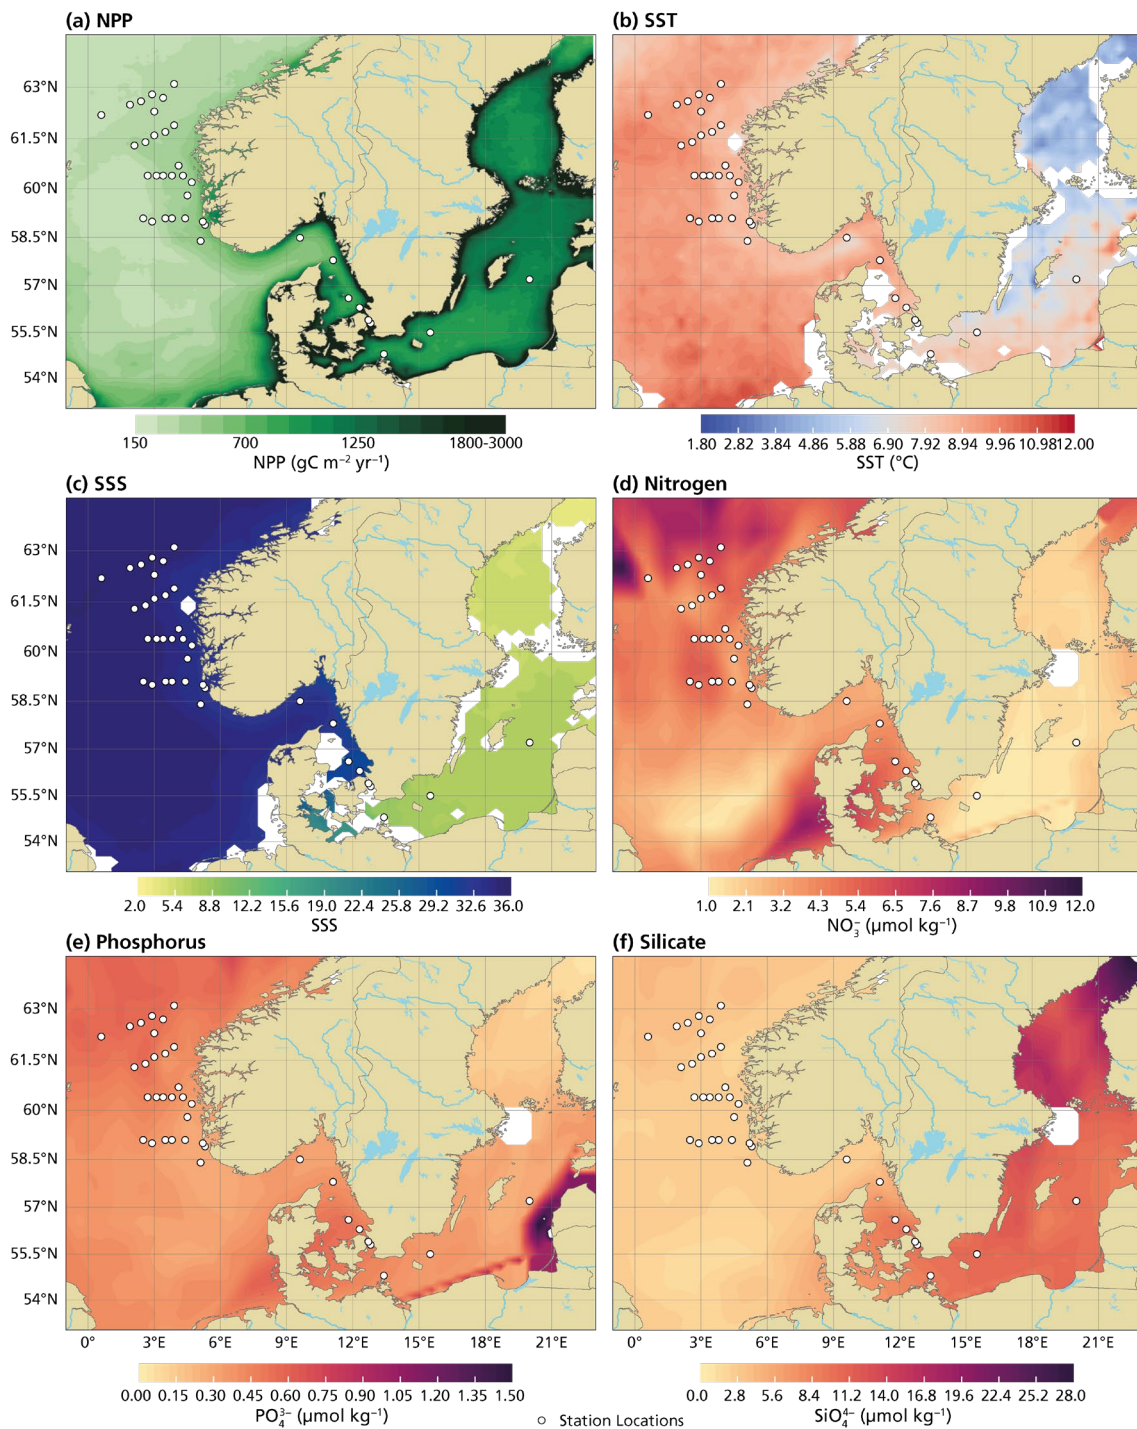

17

**Figure S1: Surface water column data.** a: Net primary productivity (NPP) is based on annual mean surface chlorophyll-a concentrations derived from the AQUA MODIS satellite for the period 2003-2023 (Behrenfeld & Falkowski, 1997). b-f: The data represent the annual mean values at 20 m water depth, averaged from available measurements between 1955/1965 and 2022, based on the 2023 World Ocean Atlas dataset (Reagan et al., 2024).

**Table S1: Station information of the 37 core locations. For the type of core, ‘MC’ stands for multi-core and ‘BC’ for box-core. The sampling year corresponds to the year of the research cruise.**

| Area             | Sample | Type core | Latitude<br>(° N) | Longitude<br>(° E) | Depth of<br>water<br>column (m) | Year of<br>sampling | Cruise-<br>station |
|------------------|--------|-----------|-------------------|--------------------|---------------------------------|---------------------|--------------------|
| Baltic Sea       | B1     | MC        | 57.21             | 19.95              | 220                             | 2016                | 64PE410-10         |
| Baltic Sea       | B2     | MC        | 55.47             | 15.48              | 93                              | 2016                | 64PE410-9          |
| Baltic Sea       | B3     | MC        | 54.85             | 13.36              | 45                              | 2016                | 64PE410-7          |
| Baltic Sea       | B4     | MC        | 55.82             | 12.76              | 27                              | 2016                | 64PE410-6          |
| Baltic Sea       | B5     | MC        | 55.93             | 12.71              | 45                              | 2016                | 64PE410-5          |
| Kattegat         | K6     | MC        | 56.28             | 12.28              | 30                              | 2016                | 64PE410-4          |
| Kattegat         | K7     | MC        | 56.6              | 11.78              | 38                              | 2016                | 64PE410-3          |
| Skagerrak        | S8     | MC        | 57.77             | 11.12              | 44                              | 2016                | 64PE410-2          |
| Skagerrak        | S9     | MC        | 58.5              | 9.6                | 550                             | 2016                | 64PE410-10         |
| Norwegian Trench | N10    | MC        | 58.4              | 5.1                | 308                             | 2024                | 64PE534-5          |
| Norwegian Trench | N11    | MC        | 58.9              | 5.29               | 124                             | 2024                | 64PE534-25         |
| Norwegian Trench | N12    | MC        | 59                | 5.16               | 240                             | 2024                | 64PE534-21         |
| Norwegian Trench | N13    | BC        | 59.13             | 4.45               | 259                             | 2023                | 64PE517-4          |
| Norwegian Trench | N14    | MC        | 59.12             | 3.84               | 273                             | 2023                | 64PE517-11         |
| Norwegian Trench | N15    | MC        | 59.09             | 3.47               | 209                             | 2023                | 64PE517-16         |
| Norwegian Trench | N16    | MC        | 59.83             | 4.52               | 282                             | 2024                | 64PE534-34         |
| Norwegian Trench | N17    | MC        | 60.15             | 4.74               | 346                             | 2024                | 64PE534-30         |
| Norwegian Trench | N18    | MC        | 60.38             | 4.28               | 290                             | 2023                | 64PE517-62         |
| Norwegian Trench | N19    | MC        | 60.75             | 4.14               | 318                             | 2024                | 64PE534-55         |
| Norwegian Trench | N20    | MC        | 60.37             | 3.81               | 297                             | 2023                | 64PE517-57         |

|                  |      |    |       |      |      |      |             |
|------------------|------|----|-------|------|------|------|-------------|
| Norwegian Trench | N21  | MC | 60.37 | 3.44 | 300  | 2023 | 64PE517-49  |
| Norwegian Trench | N22  | MC | 61.86 | 3.87 | 259  | 2023 | 64PE517-122 |
| Norwegian Trench | N23  | MC | 61.71 | 3.52 | 369  | 2023 | 64PE517-115 |
| Norwegian Trench | N24  | MC | 61.57 | 3.05 | 404  | 2023 | 64PE517-79  |
| Norwegian Trench | N25  | MC | 61.42 | 2.65 | 378  | 2023 | 64PE517-67  |
| Fladen ground    | F26  | MC | 59.04 | 2.93 | 139  | 2023 | 64PE517-22  |
| Fladen ground    | F27  | MC | 59.09 | 2.48 | 126  | 2023 | 64PE517-30  |
| Fladen ground    | F28  | BC | 60.36 | 3.12 | 131  | 2023 | 64PE517-44  |
| Fladen ground    | F29  | BC | 60.37 | 2.72 | 104  | 2023 | 64PE517-37  |
| Fladen ground    | F30  | BC | 61.29 | 2.12 | 218  | 2023 | 64PE517-73  |
| Atlantic Ocean   | AO31 | BC | 63.14 | 3.91 | 1012 | 2024 | 64PE534-85  |
| Atlantic Ocean   | AO32 | BC | 62.72 | 3.35 | 494  | 2023 | 64PE517-100 |
| Atlantic Ocean   | AO33 | MC | 62.34 | 3.03 | 385  | 2023 | 64PE517-84  |
| Atlantic Ocean   | AO34 | MC | 62.76 | 2.88 | 601  | 2023 | 64PE517-104 |
| Atlantic Ocean   | AO35 | MC | 62.62 | 2.38 | 574  | 2023 | 64PE517-92  |
| Atlantic Ocean   | AO36 | MC | 62.48 | 1.89 | 542  | 2023 | 64PE517-96  |
| Atlantic Ocean   | AO37 | BC | 62.2  | 0.6  | 604  | 2024 | 64PE534-106 |

**Table S2: List of palynomorphic groups identified in this study, with corresponding abbreviations, environments, and taxa/groups included in each category.**

| Palynomorphs         | Abbreviation | Environment        | Which species included                                                                                                                                                                                                                                                                                                                                                           |
|----------------------|--------------|--------------------|----------------------------------------------------------------------------------------------------------------------------------------------------------------------------------------------------------------------------------------------------------------------------------------------------------------------------------------------------------------------------------|
| Bisaccate pollen     | BP           | Terrestrial        | Picea, Pinus                                                                                                                                                                                                                                                                                                                                                                     |
| Non-bisaccate pollen | NBP          | Terrestrial        | Herbs ( <i>Artemisia</i> , Asteraceae, Brassicaceae, Chenopodiaceae, Cyperaceae, Ericaceae, <i>Galium</i> , <i>Plantago</i> , Poaceae, <i>Rumex</i> , <i>Urtica</i> ) and trees and shrubs ( <i>Alnus</i> , <i>Betula</i> , <i>Carpinus</i> , <i>Corylus</i> , <i>Fagus</i> , <i>Fraxinus</i> , <i>Juniperus</i> , <i>Quercus</i> , <i>Salix</i> , <i>Tilia</i> , <i>Ulmus</i> ) |
| Spores               | Spores       | Terrestrial        | Dryopteris, Pteridium, Sphagnum, Spores spp.                                                                                                                                                                                                                                                                                                                                     |
| Freshwater algae     | Algae        | Freshwater         | <i>Botryococcus</i> , Euglenoid cysts, <i>Pediastrum</i>                                                                                                                                                                                                                                                                                                                         |
| Dinocysts            | Dino         | Brackish to marine | All dinocyst species listed in Table 1                                                                                                                                                                                                                                                                                                                                           |
| Zoomorph remains     | Zoo          | Brackish to marine | Copepod eggs, <i>Halodinium verrucatum</i> , <i>Hexasterias problematica</i> , Foraminiferal linings, <i>Radiosperma corbiferum</i> , Tintinnids cyst, Tintinnids lorica                                                                                                                                                                                                         |
| Other palynomorphs   | Other        | Variable           | Acritarch spp., Palynomorph type 3 (Price & Pospelova, 2011), Palynomorph type x, Palynomorph type y, Palynomorph type z,                                                                                                                                                                                                                                                        |

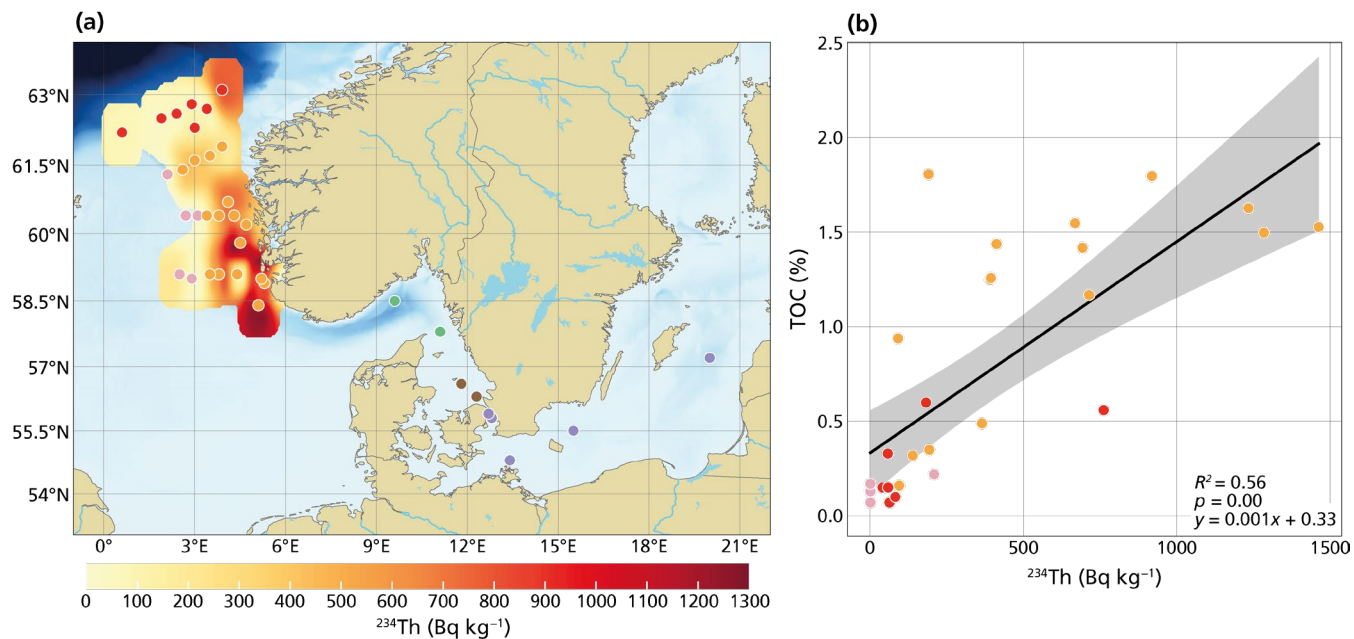

**Figure S2: Surface sediment data of  $^{234}\text{Th}$  on a map (a) and correlated to total organic carbon (TOC) (b). In panel b a linear regression is applied with a 95 % confidence interval around the regression line (gray).**

**Table S3: Sedimentation rates derived from  $^{210}\text{Pb}$  dating using the Constant Flux / Constant Sedimentation (CF/CS) model (Carpenter et al., 1982).**

| Sample | Sedimentation rate (cm yr <sup>-1</sup> ) |
|--------|-------------------------------------------|
| B1     | 0.015                                     |
| N10    | 0.21                                      |
| N14    | 0.12                                      |
| N20    | 0.14                                      |
| N23    | 0.088                                     |
| N24    | 0.17                                      |
| A31    | 0.024                                     |
| A33    | 0.032                                     |

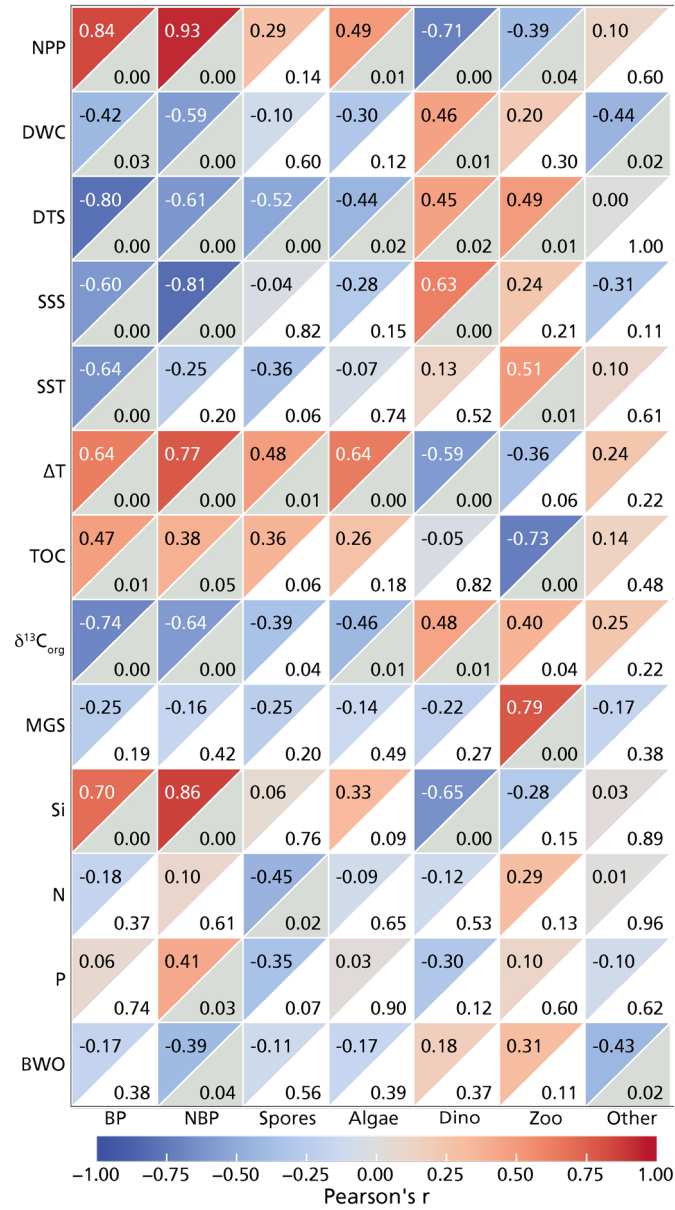

**Figure S3: Correlation matrix between palynomorph groups (relative abundances; x-axis) and environmental parameters (y-axis) without the inner Baltic Sea station (B1–3). In each square, the top-left corner shows the  $r$  values (Pearson's correlations coefficients based on color scale), and the bottom-right corner shows the  $p$  values, in gray when below 0.05 and white when above 0.05. Abbreviations for the palynomorph groups are listed in Table S2.**

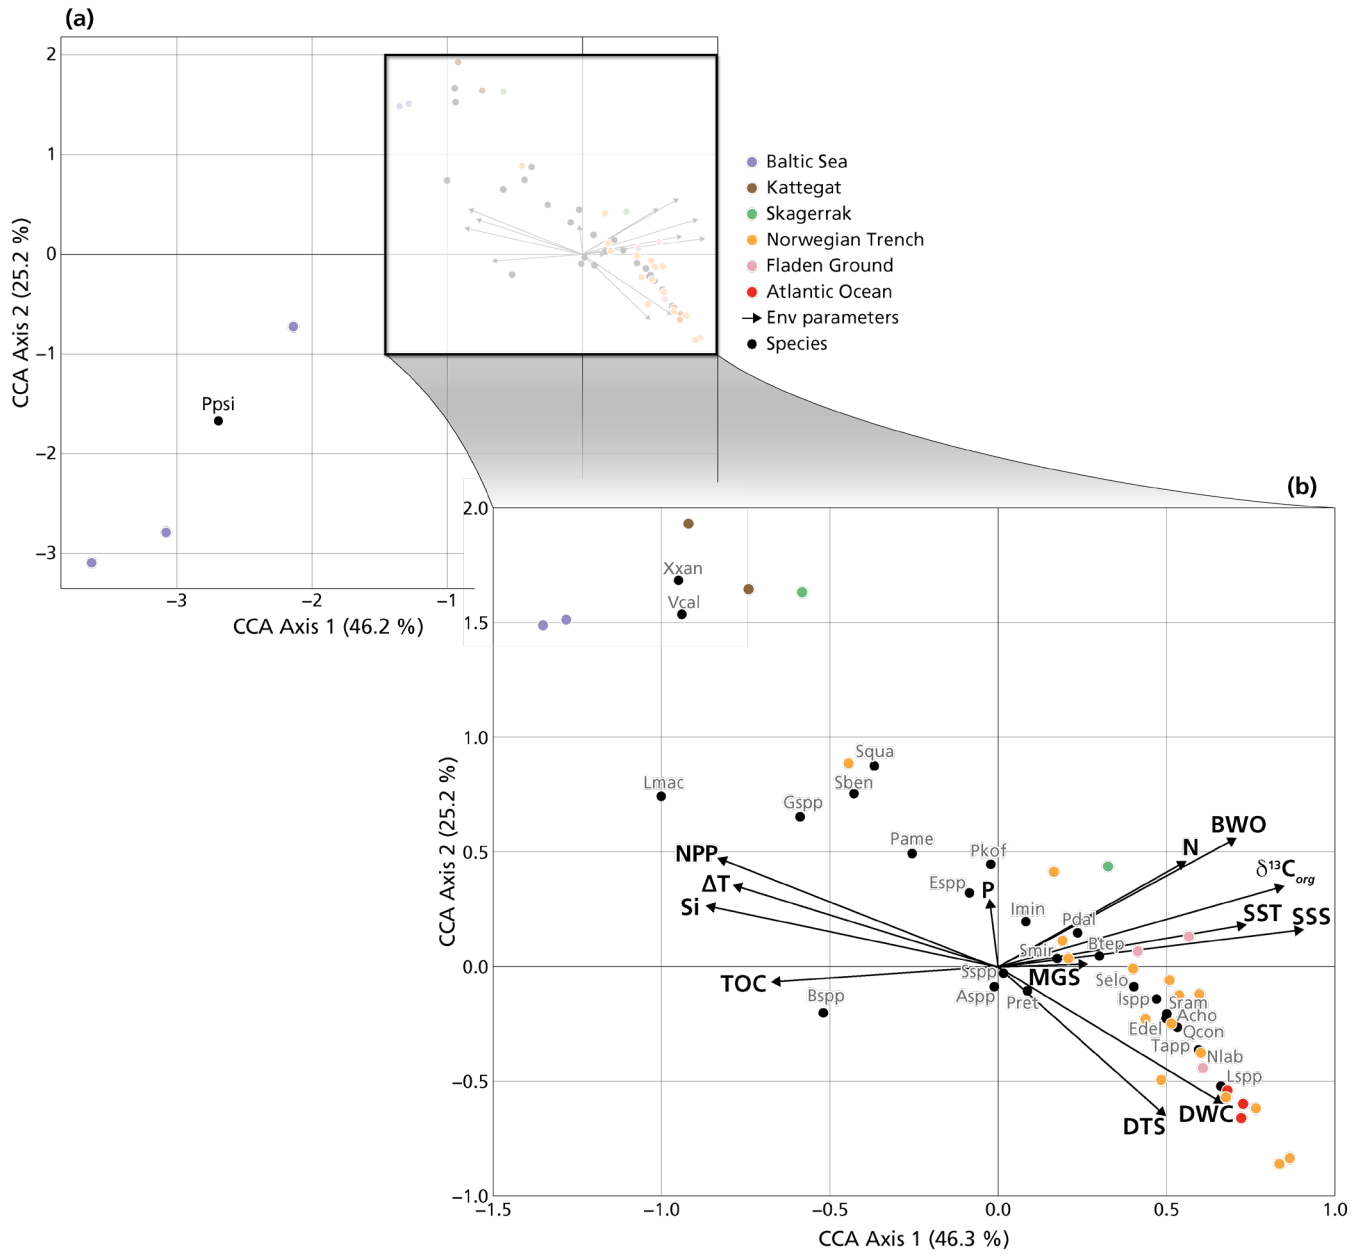

**Figure S4:** The CCA performed on all samples. Abbreviations of dinocyst species are listed in Table 1. The explained variance (%) for each axis is shown in brackets in the axis titles. **a:** Biplot CCA 1 vs CCA 2. **b:** Zoomed in on CCA 1 vs CCA 2.

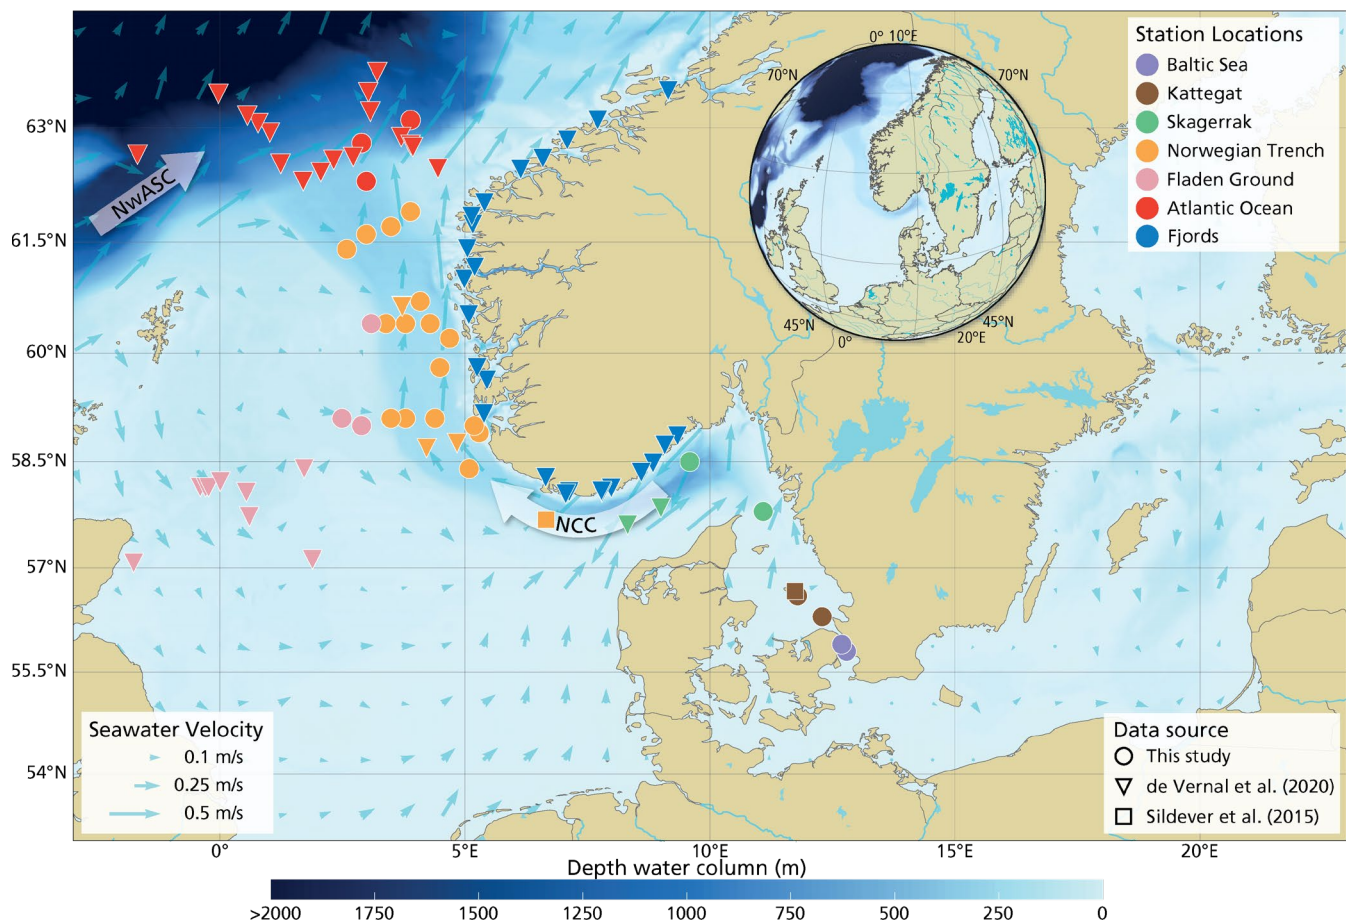

**Figure S5:** Map showing station locations of surface samples from this study, Sildever et al. (2015), and de Vernal et al. (2020). The stations are overlaid on a geographic base map including coastlines, national boundaries, rivers, and lakes (<https://www.natureearthdata.com/>, last access: 18 February 2026, scale: 1:10m). The colors of the station locations are assigned based on their geographic region. The small light-blue arrows represent the mean seawater velocity value of 2021-2024 derived from the EU Copernicus Marine Service physical model product (<https://doi.org/10.48670/moi-00016>, E.U. Copernicus Marine Service, 2025).

35  
36  
37  
38

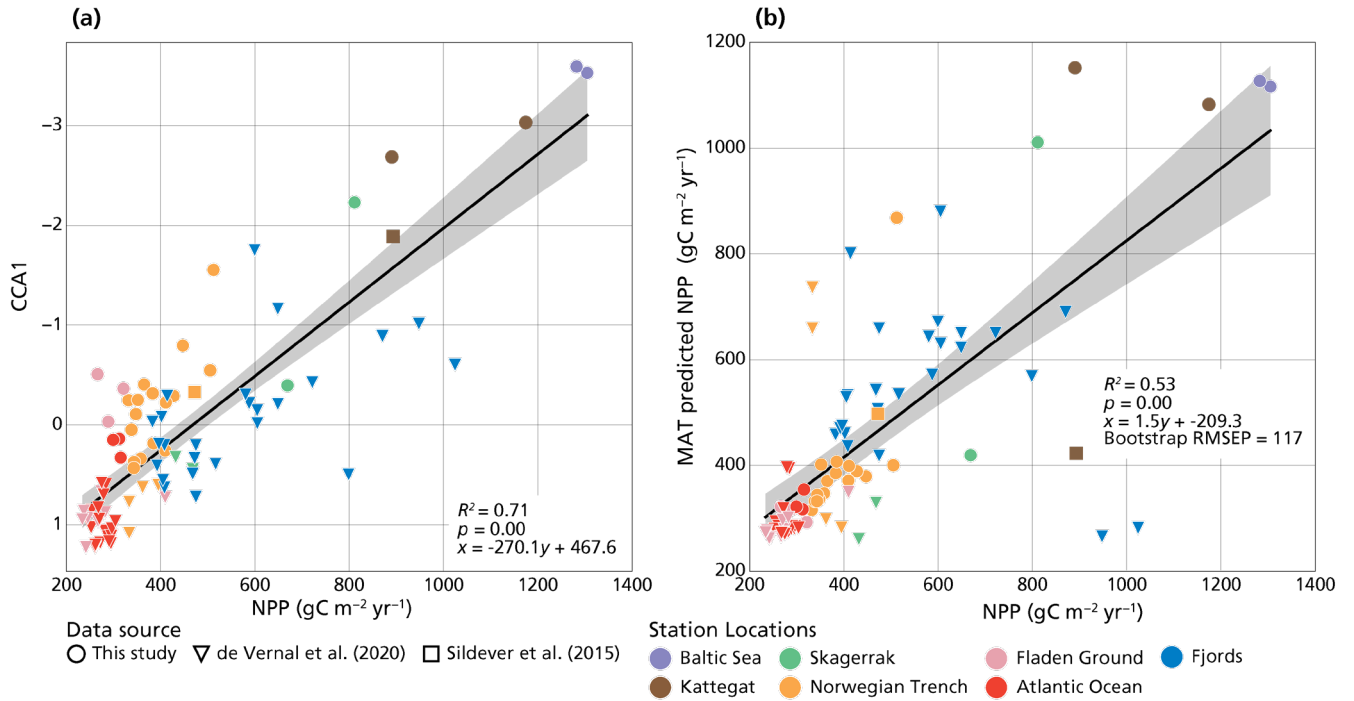

**Figure S6: Proxy relationships with NPP using station data from three datasets: our study, Sildever et al. (2015), and de Vernal et al. (2020). NPP is compared to CCA1 station scores (a) and MAT predicted NPP values (b). Samples in the inner Baltic Sea are excluded. For both proxies, a 95 % confidence interval is shown around the regression line (gray). The reported bootstrap root mean square error of prediction (RMSEP) is based on 999 iterations ( $117 \text{ gC m}^{-2} \text{yr}^{-1}$ ).**
